# Supplementary material for: Theoretical study on the tetranuclear endohedral vanadyl carboxylates with guest-switchable redox properties and large polarizability
Source: Royal Society of Chemistry journal article supplement (doi:10.1039/b922876d), 2010-01-01
Supplement: b922876d.pdf [file b922876d.pdf]

## Supporting Information

**Table S1** The bond parameters (Å) calculated in solution phase for the studied compounds

| Compound  | V-O <sub>d</sub> | V-O <sub>c</sub> | V-O <sub>t</sub> | C-O <sub>c</sub> | V-X                |
|-----------|------------------|------------------|------------------|------------------|--------------------|
| <b>a3</b> | 1.813            | 2.021            | 1.610            | 1.279            | 2.547              |
| <b>a4</b> | 1.814            | 2.023            | 1.613            | 1.281            | 2.906              |
| <b>a5</b> | 1.813            | 2.025            | 1.613            | 1.282            | 3.051              |
| <b>b1</b> | 1.807            | 2.003            | 1.603            | 1.286            |                    |
| <b>b2</b> | 1.810            | 2.008            | 1.612            | 1.282            | <sup>a</sup> 2.746 |
| <b>b3</b> | 1.813            | 2.020            | 1.614            | 1.280            | 2.532              |
| <b>b4</b> | 1.813            | 2.022            | 1.616            | 1.282            | 2.903              |
| <b>b5</b> | 1.812            | 2.024            | 1.616            | 1.282            | 3.049              |

<sup>a</sup>The distance between V atom and O<sub>1</sub> atom in NO<sub>3</sub> unit.
